# Supplementary material for: Association between Serum Level of Multiple Trace Elements and Esophageal Squamous Cell Carcinoma Risk: A Case–Control Study in China
Source: MDPI journal article supplement (doi:10.3390/cancers14174239), 2022-08-31
Supplement: s1 [file s1]

# Supplementary Materials:

Table S1. Clinical information of the ESCC patients (N=185)

| <i>Variables</i>       | <i>Cases, n (%)</i> |
|------------------------|---------------------|
| <i>Location, n=184</i> |                     |
| <i>Upper</i>           | 33(17.9)            |
| <i>Middle</i>          | 111(60.4)           |
| <i>Lower</i>           | 40(21.7)            |
| <i>pGrade, n=183</i>   |                     |
| <i>G1</i>              | 45(24.6)            |
| <i>G2</i>              | 61(33.3)            |
| <i>G3</i>              | 72(39.3)            |
| <i>X</i>               | 5(2.8)              |
| <i>pT, n=183</i>       |                     |
| <i>Tis/T1</i>          | 19(10.4)            |
| <i>T2</i>              | 24(13.1)            |
| <i>T3</i>              | 56(30.6)            |
| <i>T4</i>              | 84(45.9)            |
| <i>pN, n=183</i>       |                     |
| <i>N0</i>              | 79(43.2)            |
| <i>N1</i>              | 62(33.9)            |
| <i>N2</i>              | 31(16.9)            |
| <i>N3</i>              | 11(6.0)             |
| <i>pTNM, n=183</i>     |                     |
| <i>0</i>               | 1(0.6)              |
| <i>I</i>               | 17(9.3)             |
| <i>II</i>              | 37(20.2)            |
| <i>III</i>             | 84(45.9)            |
| <i>IV</i>              | 44(24.0)            |

Table S2. Collinearity diagnostics of the 13 trace elements

| <i>Element</i> | <i>Tolerance</i> | <i>VIF</i> |
|----------------|------------------|------------|
| LnAl           | 0.322            | 3.106      |
| LnV            | 0.649            | 1.542      |
| LnCr           | 0.400            | 2.503      |
| LnMn           | 0.499            | 2.005      |
| LnCo           | 0.767            | 1.304      |

|      |       |       |
|------|-------|-------|
| LnNi | 0.559 | 1.79  |
| LnCu | 0.928 | 1.077 |
| LnZn | 0.487 | 2.055 |
| LnAs | 0.779 | 1.284 |
| LnSe | 0.701 | 1.426 |
| LnSr | 0.56  | 1.787 |
| LnCd | 0.449 | 2.227 |
| LnPb | 0.266 | 3.760 |

Abbreviations: VIF, variance inflation factor.

Table S3. Odds ratios (ORs) and 95% confidence intervals (95% CIs) for individual serum trace elements associated with ESCC

| Elements | Variables    | Quartile 1 | Quartile 2       | Quartile 3      | Quartile 4       | P for trend |
|----------|--------------|------------|------------------|-----------------|------------------|-------------|
| Al       | Case/control | 58/36      | 49/45            | 31/63           | 47/47            |             |
|          | Model 1      | 1 (Ref.)   | 0.68(0.38,1.21)  | 0.31(0.17,0.56) | 0.62(0.36,1.11)  | 0.019       |
|          | Model 2      | 1 (Ref.)   | 0.67(0.36,1.25)  | 0.29(0.15,0.55) | 0.62(0.33,1.15)  | 0.026       |
| V        | Case/control | 27/67      | 55/39            | 61/33           | 42/52            |             |
|          | Model 1      | 1 (Ref.)   | 3.50 (1.91,6.42) | 4.59(2.48,8.55) | 2.00(1.10,3.67)  | 0.019       |
|          | Model 2      | 1 (Ref.)   | 3.81(1.97,7.36)  | 5.06(2.60,9.83) | 2.04 (1.06,3.94) | 0.027       |
| Cr       | Case/control | 48/46      | 46/48            | 39/55           | 52/42            |             |
|          | Model 1      | 1 (Ref.)   | 0.92(0.52,1.63)  | 0.68(0.38,1.21) | 1.18(0.67,2.11)  | 0.818       |
|          | Model 2      | 1 (Ref.)   | 1.13(0.61,2.09)  | 0.83(0.45,1.54) | 1.28(0.69,2.38)  | 0.675       |
| Mn       | Case/control | 58/36      | 51/43            | 44/50           | 32/62            |             |
|          | Model 1      | 1 (Ref.)   | 0.74(0.41,1.32)  | 0.55(0.31,0.98) | 0.32(0.18,0.58)  | <0.001      |
|          | Model 2      | 1 (Ref.)   | 0.70(0.38,1.31)  | 0.59(0.32,1.09) | 0.29(0.15,0.56)  | <0.001      |
| Co       | Case/control | 58/36      | 48/46            | 38/56           | 41/53            |             |
|          | Model 1      | 1 (Ref.)   | 0.65(0.36,1.16)  | 0.42(0.24,0.76) | 0.48(0.27,0.86)  | 0.005       |
|          | Model 2      | 1 (Ref.)   | 0.69(0.37,1.26)  | 0.43(0.23,0.82) | 0.53(0.28,0.97)  | 0.018       |
| Ni       | Case/control | 40/54      | 51/43            | 56/38           | 38/56            |             |
|          | Model 1      | 1 (Ref.)   | 1.60(0.90,2.85)  | 1.99(1.11,3.56) | 0.92(0.51,1.64)  | 0.963       |
|          | Model 2      | 1 (Ref.)   | 1.71(0.93,3.17)  | 2.04(1.10,3.78) | 0.86(0.46,1.61)  | 0.834       |
| Cu       | Case/control | 48/46      | 39/55            | 49/45           | 49/45            |             |
|          | Model 1      | 1 (Ref.)   | 0.68(0.38,1.21)  | 1.04(0.59,1.85) | 1.04(0.59,1.85)  | 0.549       |
|          | Model 2      | 1 (Ref.)   | 0.65(0.35,1.21)  | 1.31(0.70,2.43) | 1.27(0.69,2.35)  | 0.159       |
| Zn       | Case/control | 81/13      | 47/47            | 23/71           | 34/60            |             |
|          | Model 1      | 1 (Ref.)   | 0.16(0.08,0.33)  | 0.05(0.03,0.11) | 0.09(0.04,0.19)  | <0.001      |
|          | Model 2      | 1 (Ref.)   | 0.19(0.09,0.40)  | 0.05(0.02,0.11) | 0.10(0.05,0.21)  | <0.001      |
| As       | Case/control | 63/31      | 52/42            | 37/57           | 15/79            |             |
|          | Model 1      | 1 (Ref.)   | 0.61(0.34,1.10)  | 0.28(0.15,0.51) | 0.31(0.17,0.56)  | <0.001      |
|          | Model 2      | 1 (Ref.)   | 0.57(0.30,1.07)  | 0.25(0.13,0.47) | 0.29(0.15,0.55)  | <0.001      |
| Se       | Case/control | 81/13      | 52/42            | 37/57           | 15/79            |             |
|          | Model 1      | 1 (Ref.)   | 0.20(0.10,0.41)  | 0.10(0.05,0.21) | 0.03(0.01,0.07)  | <0.001      |
|          | Model 2      | 1 (Ref.)   | 0.18(0.09,0.38)  | 0.11(0.05,0.23) | 0.04(0.02,0.08)  | <0.001      |
| Sr       | Case/control | 75/19      | 67/27            | 41/53           | 2/92             |             |
|          | Model 1      | 1 (Ref.)   | 0.63(0.32,1.23)  | 0.20(0.10,0.38) | 0.01(0.00,0.02)  | <0.001      |
|          | Model 2      | 1 (Ref.)   | 0.63(0.31,1.29)  | 0.19(0.10,0.38) | 0.01(0.00,0.02)  | <0.001      |
| Cd       | Case/control | 56/38      | 47/47            | 39/55           | 43/51            |             |
|          | Model 1      | 1 (Ref.)   | 0.68(0.38,1.21)  | 0.48(0.27,0.86) | 0.57(0.32,1.02)  | 0.031       |
|          | Model 2      | 1 (Ref.)   | 0.80(0.43,1.48)  | 0.48(0.26,0.90) | 0.57(0.31,1.07)  | 0.030       |
| Pb       | Case/control | 47/47      | 46/48            | 36/58           | 56/38            |             |
|          | Model 1      | 1 (Ref.)   | 0.96(0.54,1.70)  | 0.62(0.35,1.11) | 1.47(0.83,2.63)  | 0.433       |
|          | Model 2      | 1 (Ref.)   | 0.91(0.49,1.69)  | 0.63(0.34,1.17) | 1.60(0.86,2.97)  | 0.296       |

Note: Model 1 is unadjusted. Model 2 is adjusted for smoking, drinking and family history of EC.

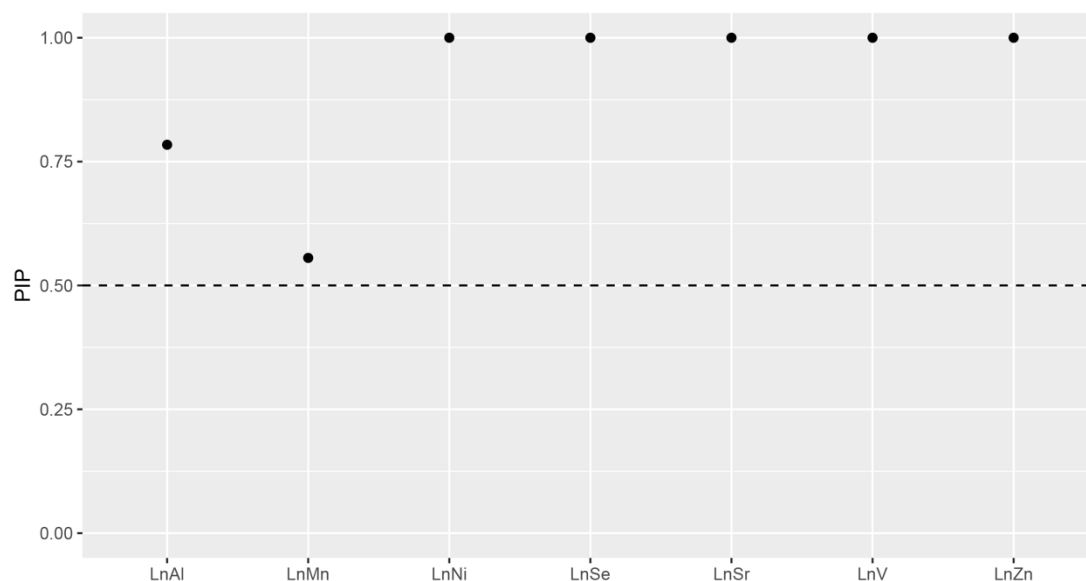

**Figure S1.** Posterior inclusion probability (PIP) for the included trace elements. Abbreviations: Al, Aluminum; V, Vanadium; Mn, Manganese; Co, Cobalt; Ni, Nickel; Zn, Zinc; As, Arsenic; Se, Selenium; Sr, Strontium; Cd, Cadmium. The PIPs can be thought of as a measure of the variables' importance, with higher values (closer to 1) indicating higher importance, and lower values (closer to 0) indicating lower importance.

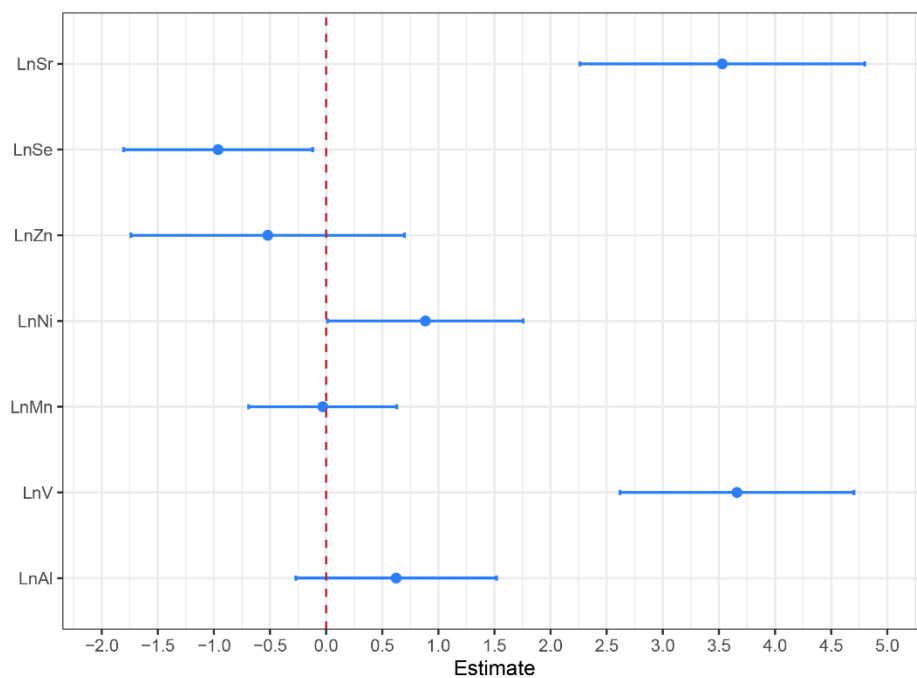

**Figure S2.** Interaction effects of the seven trace elements. Each individual effect was compared when the concentrations of other trace elements were fixed to their 75th percentile to when their concentrations were fixed to their 25th percentile.
